# Supplementary material for: Nintendo Switch Joy-Cons’ Infrared Motion Camera Sensor for Training Manual Dexterity in People with Multiple Sclerosis: A Randomized Controlled Trial
Source: MDPI journal article supplement (doi:10.3390/jcm11123261), 2022-06-07
Supplement: s1 [file s1]

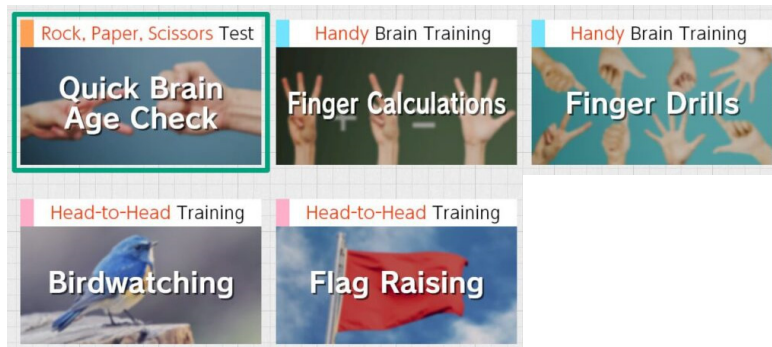

**Flag Raising**

**Finger Drills**

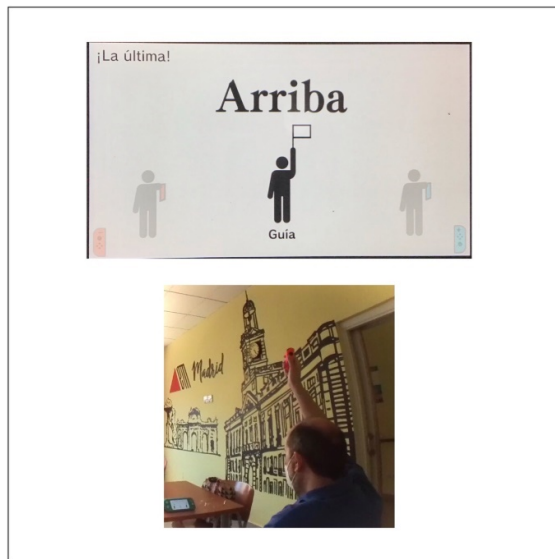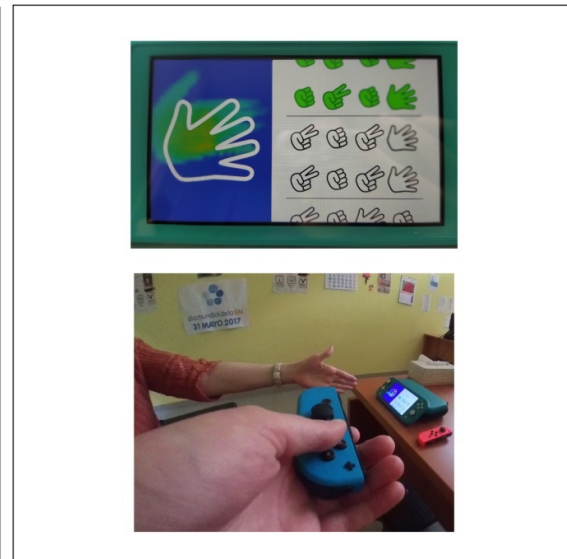

**Birdwatching**

**Finger Calculations**

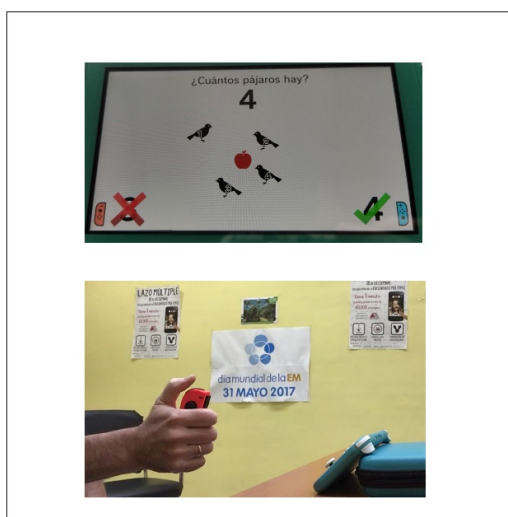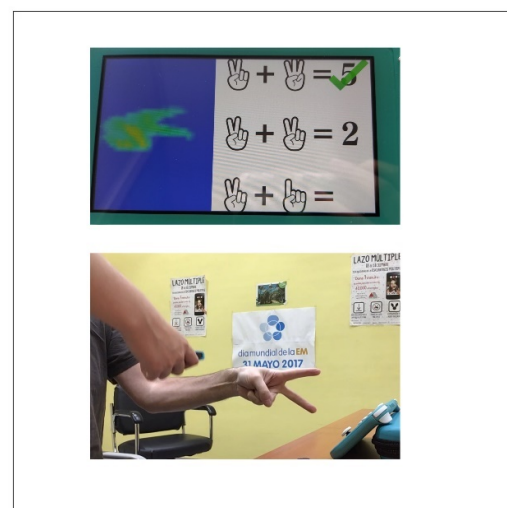

**Rock-Paper-Scissors game**

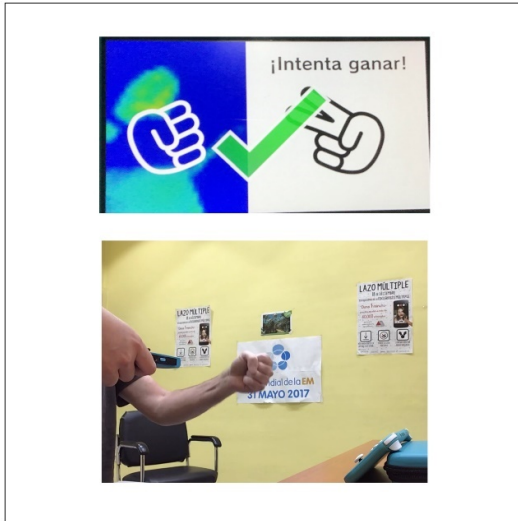

**Figure S1.** Experimental protocol.
